# Supplementary material for: Burden of leptospirosis in Brazil in the last decade
Source: PubMed Central journal article supplement (PMC11655057; doi:10.11606/s1518-8787.2024058005859), 2024-12-16
Supplement: 1518-8787-rsp-58-53-suppl1.pdf [file 1518-8787-rsp-58-53-suppl1.pdf]

## Supplementary material

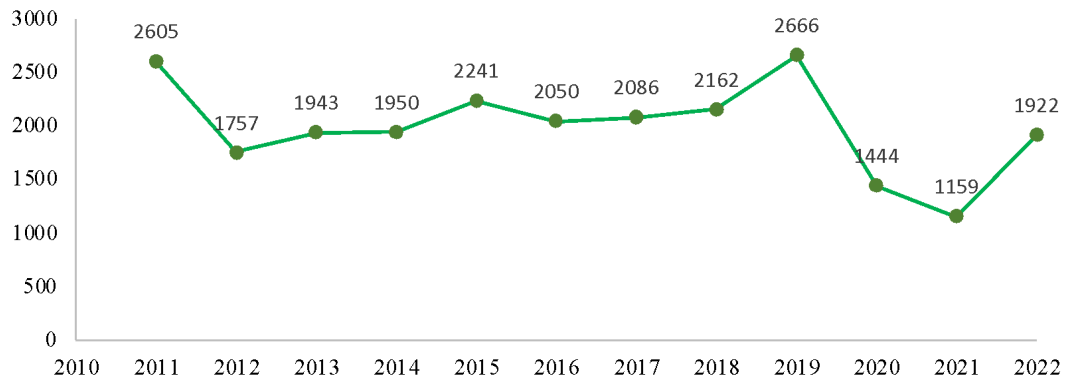

**Figure A. Count of hospitalizations** in Brazil from 2011 to 2022. Data source: TabNet/DataSUS System, 2023. The vertical axis represents the number of cases, and the horizontal axis represents the years of analysis.

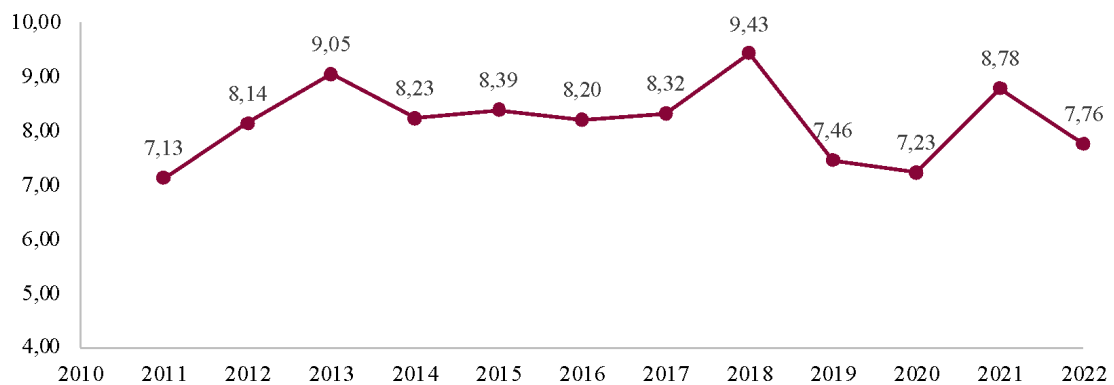

**Figure B. Average length of hospital stay** in Brazil from 2011 to 2022. Data source: TabNet/DataSUS system, 2023. ("The values are in Brazilian numerals; to convert to English numbers, replace the commas with periods.")

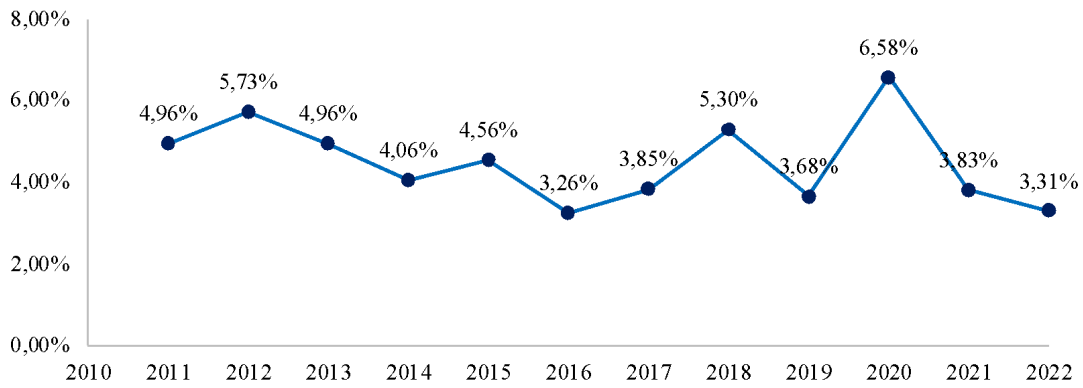

**Figure C – Fatality Rate in Brazil** from 2011 to 2022. Source: TabNet System/DataSUS, 2023. ("The values are in Brazilian numerals; to convert to English numbers, replace the commas with periods.")

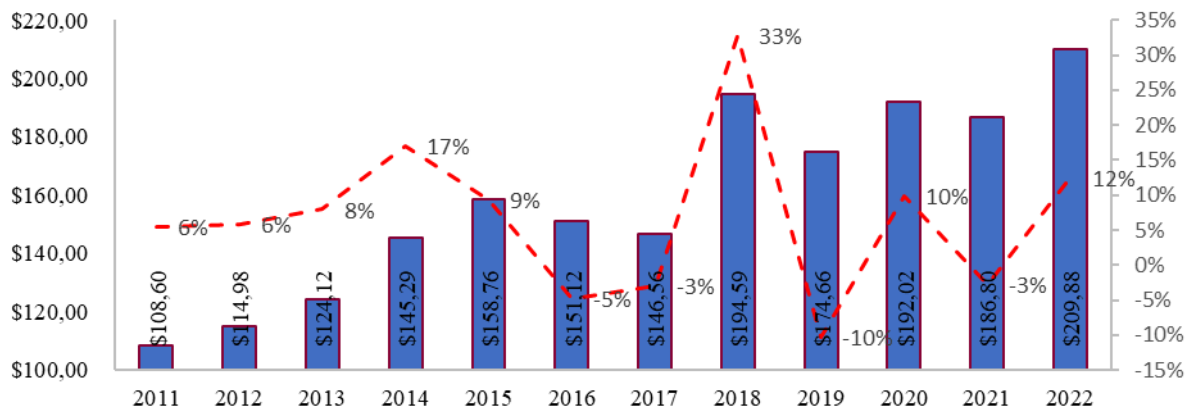

**Figure D. Average Ticket and Variation in Average Ticket** per Hospitalization in Brazil from 2011 to 2022. Source: TabNet/DataSUS System, 2023.

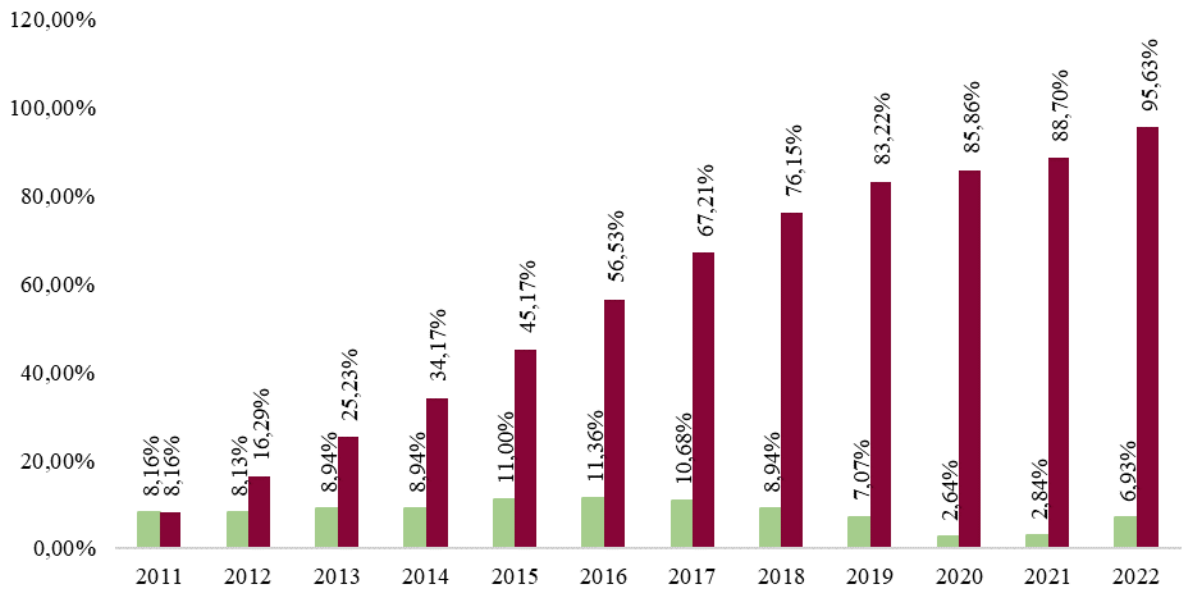

**Figure E. Consumer Price Index Health** Yearly and Accumulated in Brazil from 2011 to 2022.

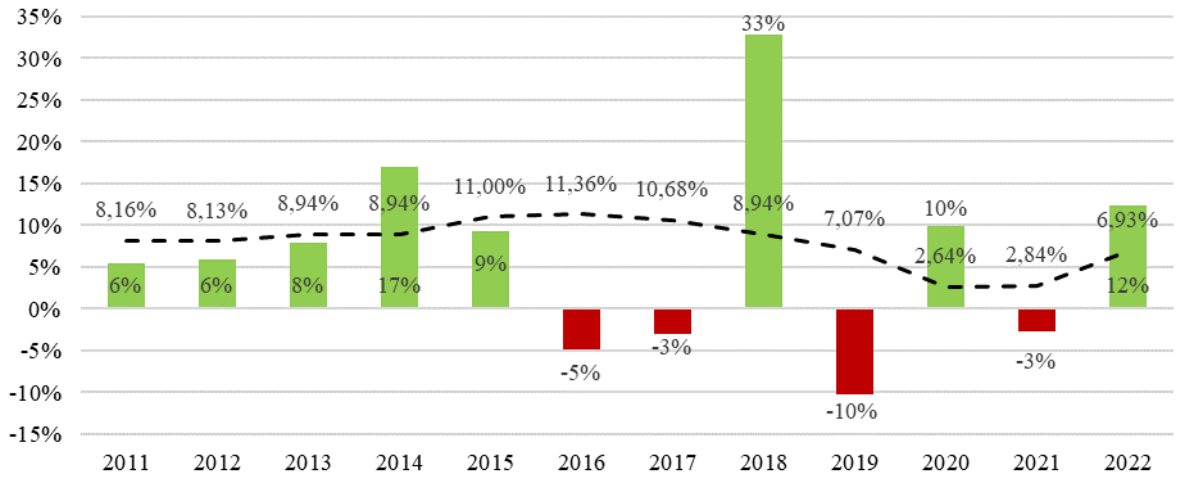

**Figure F. Annual Average Ticket Price Variation** and Annual Health CPI Variation. Columns: Annual Ticket Price Variation. Dashed Line: Annual Health CPI Variation. Source: The Author, 2023.

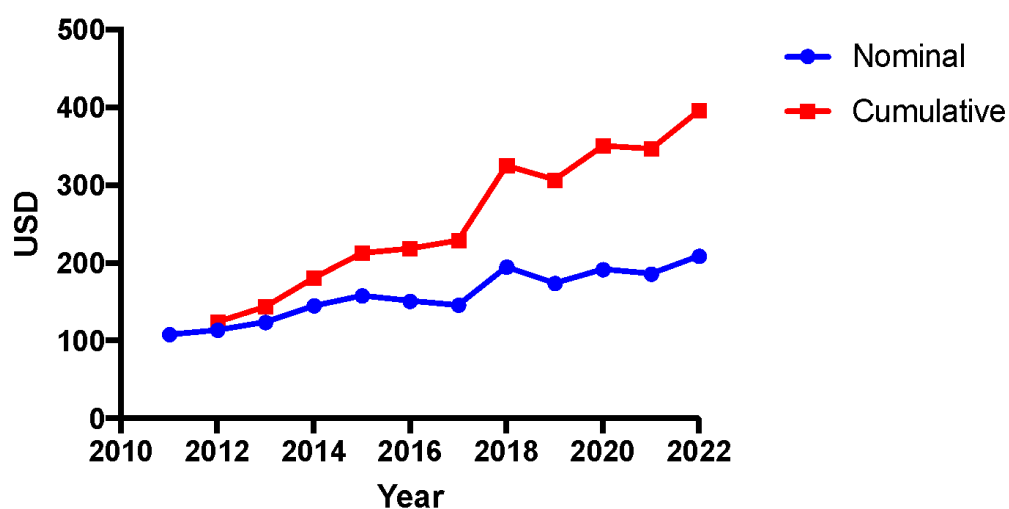

Figure G. Real and nominal values accumulated (average ticket prices) in Brazil from 2011 to 2022.

| Year | Cases of leptospirosis | Cases/ 100.000 inhabitants | Population without treated water | Population without sewage | per capita income sanitation (USD) | per capita income without sanitation (USD) | Investment (billions of USD) |
|------|------------------------|----------------------------|----------------------------------|---------------------------|------------------------------------|--------------------------------------------|------------------------------|
| 2011 | 2605                   | 39.26                      | 17.40%                           | 52.60%                    | 311.30                             | 52.94                                      | 1.66                         |
| 2012 | 1757                   | 27.38                      | 17.20%                           | 51.70%                    | 350.21                             | 59.56                                      | 1.93                         |
| 2013 | 1943                   | 29.05                      | 17.50%                           | 51.30%                    | 384.10                             | 65.32                                      | 2.07                         |
| 2014 | 1950                   | 35.06                      | 16.90%                           | 50.10%                    | 410.35                             | 69.79                                      | 2.42                         |
| 2015 | 2241                   | 35.07                      | 16.70%                           | 49.70%                    | 433.68                             | 73.76                                      | 2.26                         |
| 2016 | 2050                   | 28.61                      | 16.70%                           | 48.10%                    | 533.94                             | 90.81                                      | 2.28                         |
| 2017 | 2086                   | 29.31                      | 16.60%                           | 47.60%                    | 544.14                             | 92.54                                      | 2.16                         |
| 2018 | 2162                   | 32.26                      | 16.40%                           | 46.90%                    | 583.58                             | 99.25                                      | 2.59                         |
| 2019 | 2666                   | 35.99                      | 16.30%                           | 45.90%                    | 599.62                             | 101.98                                     | 2.99                         |
| 2020 | 1444                   | 19.81                      | 15.90%                           | 45.00%                    | 560.68                             | 95.36                                      | 2.70                         |
| 2021 | 1159                   | 16.70                      | 15.80%                           | 44.20%                    | 566.29                             | 96.31                                      | 3.42                         |

USD – American dollar

**Table H. Leptospirosis cases, sanitation, income, and public investment in sanitation in Brazil**
